# Supplementary material for: Probiotic neoantigen delivery vectors for precision cancer immunotherapy
Source: PubMed Central journal article supplement — Nature. 2024 Oct 16;635(8038):453–61. doi: 10.1038/s41586-024-08033-4 (PMC11560847; doi:10.1038/s41586-024-08033-4), 2024-10-16

**Supplementary information**

---

**Probiotic neoantigen delivery vectors for precision cancer immunotherapy**

---

In the format provided by the authors and unedited

# Supplementary Information

## Probiotic neoantigen delivery vectors for precision cancer immunotherapy

Redenti, A. *et al.*

This file contains all Supplementary Information for the article. **SI Figure 1** and **SI Figure 2** contain raw immunoblots. **SI Figure 3–10** contain the gating strategies used for flow cytometric immunophenotyping experiments.

### Contents:

SI Figure 1 | Raw immunoblots 1.

SI Figure 2 | Raw immunoblots 2.

SI Figure 3 | Gating strategy for lymphocyte cytokine stimulation, tumors.

SI Figure 4 | Gating strategy for lymphocyte cytokine stimulation, tumor-draining lymph nodes.

SI Figure 5 | Gating strategy for NK cells, B cells, CD4 and CD8 T cells in tumors, unstimulated.

SI Figure 6 | Gating strategy for cDC1 and cDC2, in B16F10 tumors.

SI Figure 7 | Gating strategy for cDC1 and cDC2, in tumor-draining lymph nodes.

SI Figure 8 | Gating strategy for myeloid cells, in B16F10 tumors.

SI Figure 9 | Gating strategy for myeloid cells, in CT26 tumors.

SI Figure 10 | Gating strategy for BMDM phagocytosis assay.

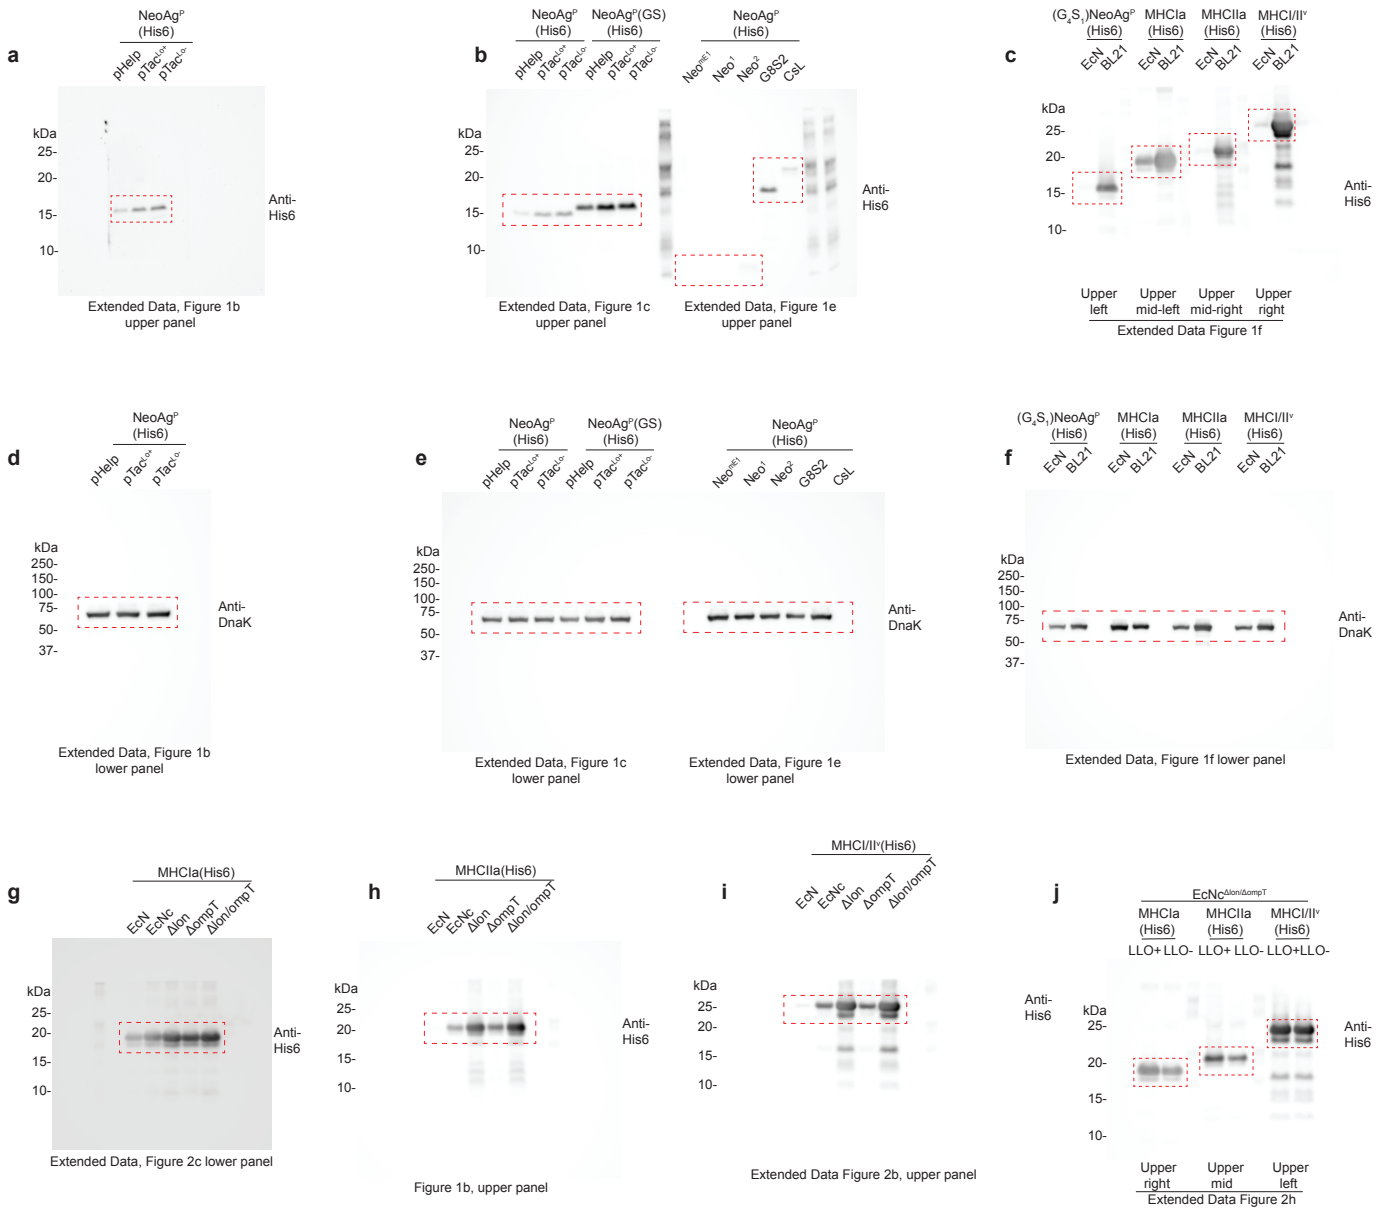

**Redenti et al.**

**SI Figure 1. Raw immunoblots 1. a-j.** The primary antibody used for each blot is indicated directly adjacent to the blot on the right-hand side. Either Anti-His6, or Anti-DnaK. **a**, Extended Data Fig. 1b, upper panel. **b**, Left: Extended Data Fig. 1c, upper panel, Right: Extended Data, Fig. 1e, upper panel. **c**, Extended Data Fig. 1f, all panels. **d**, Extended Data Fig. 1b, lower panel. **e**, Left: Extended Data Fig. 1c, lower panel, Right: Extended Data Fig. 1e, lower panel. **f**, Extended Data, Fig. 1f, lower panel. **g**, Extended Data Fig. 2c, lower panel. **h**, Fig. 1b, upper panel. **i**, Extended Data Fig. 2b, upper panel. **j**, Extended Data Fig. 2h, all panels.

Redenti et al., SI Figure 2: Raw immunoblots 2.

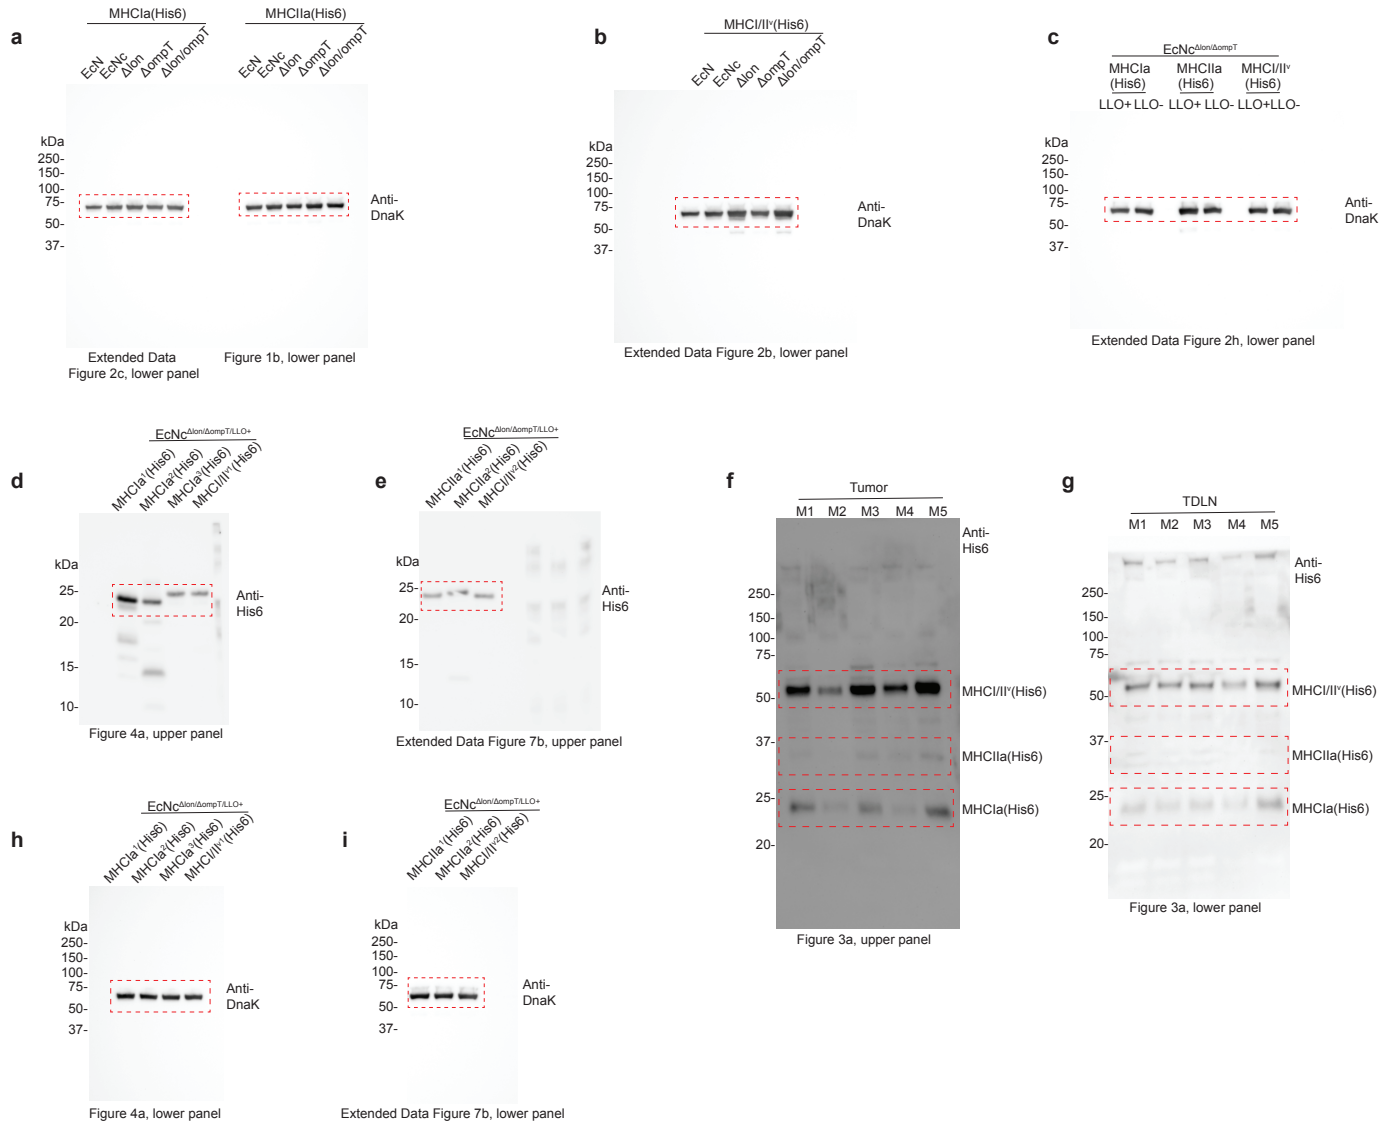

Redenti et al.

**SI Figure 2. Raw immunoblots 2.** a-i, The primary antibody used for each blot is indicated directly adjacent to the blot on the right-hand side. Either Anti-His6, or Anti-DnaK. a, Left: Extended Data Fig. 2c, lower panel; Right: Figure 1b, lower panel. b, Extended Data Fig. 2b, lower panel. c, Extended Data Fig. 2h, lower panel. d, Fig. 4a, upper panel. e, Extended Data Fig. 7b, upper panel. f, Fig. 3a, upper panel. g, Fig. 3a, lower panel. h, Fig. 4a, lower panel. i, Extended Data Fig. 7b, lower panel.

Redenti et al., SI Figure 3 - Gating strategy for tumor-infiltrating lymphocyte cytokine stimulation, tumors.

Related to: Figure 3d, 5a and Extended Data Figure 6e, 6f.

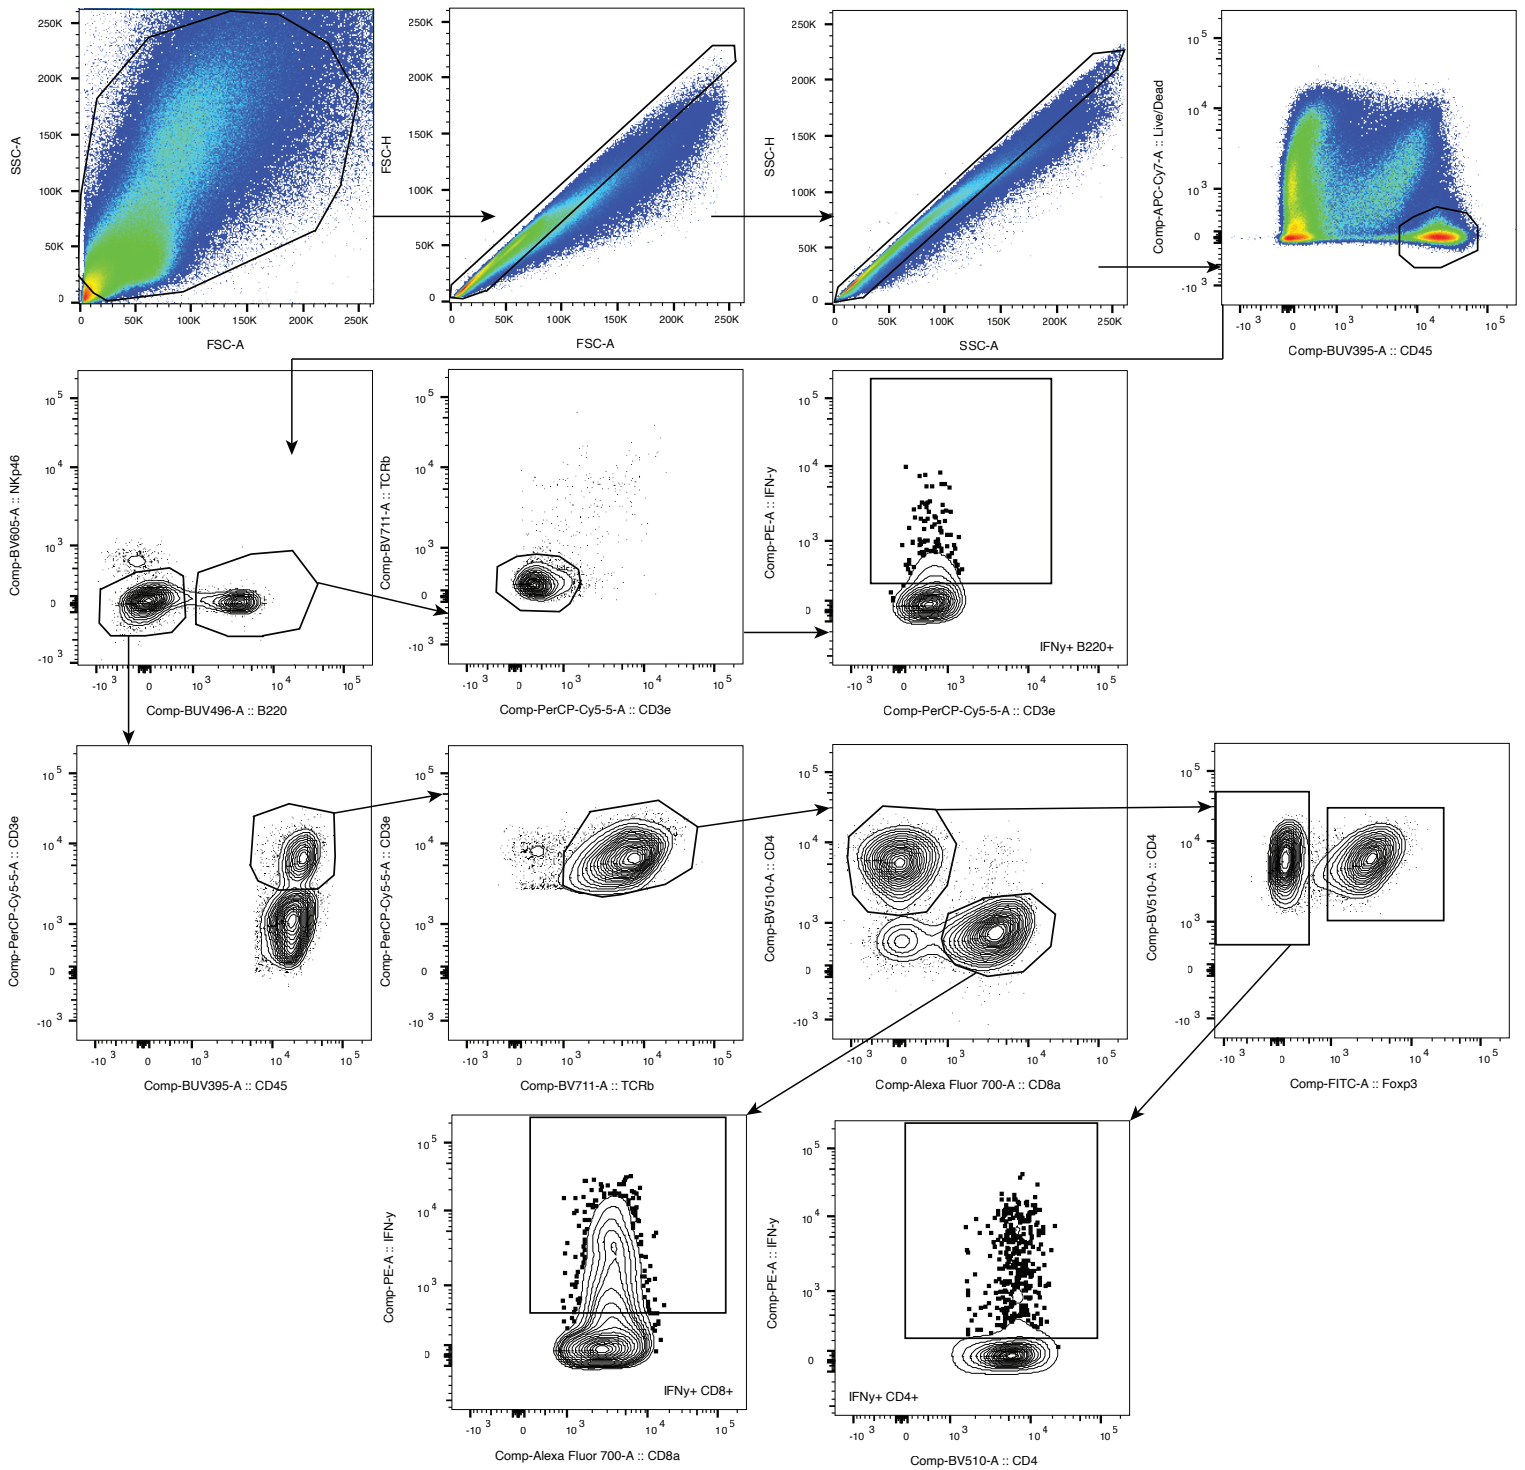

Redenti et al., SI Figure 4 - Gating strategy for lymphocyte cytokine stimulation, tumor-draining lymph nodes.

Related to: Extended Data Figure 6b, 6c.

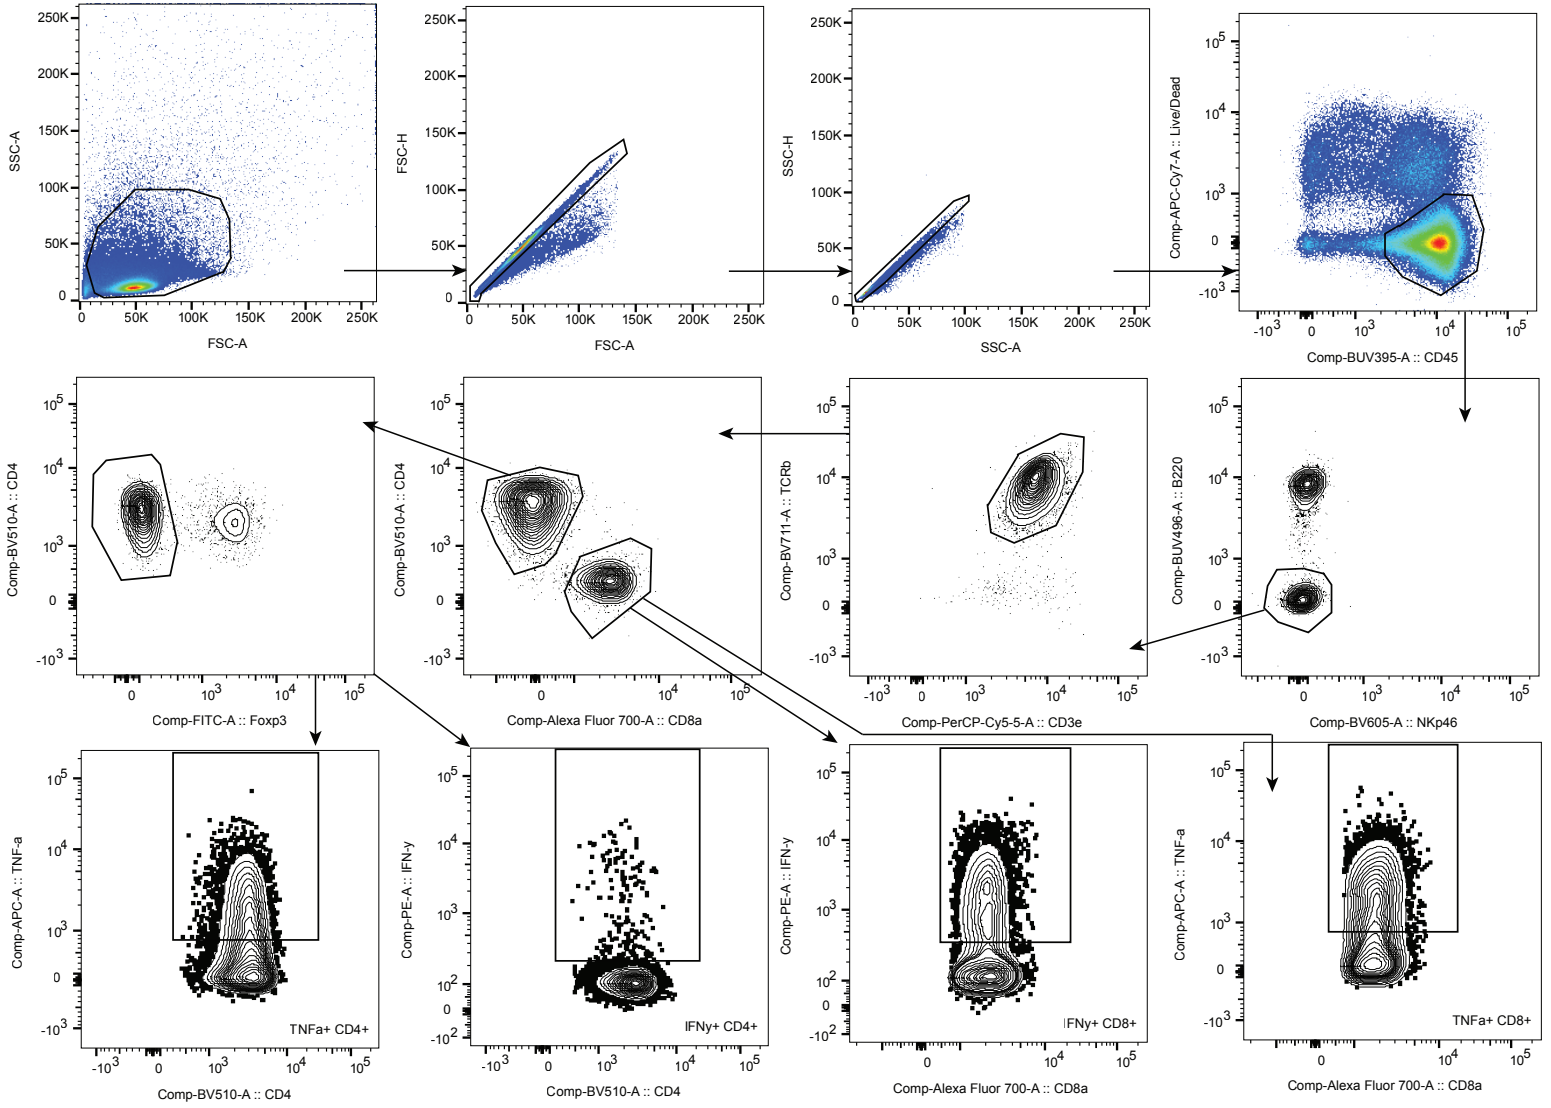

Redenti et al., SI Figure 5 - Gating strategy for NK cells, B cells, CD4 and CD8 T cells in tumors, unstimulated.

Related to: Figure 3g, 4i, 5b, 5c, 5d, 5e, and Extended Data Figure 6g, 6j, 7g, 7h, 7j, 8a, 8b, 8c.

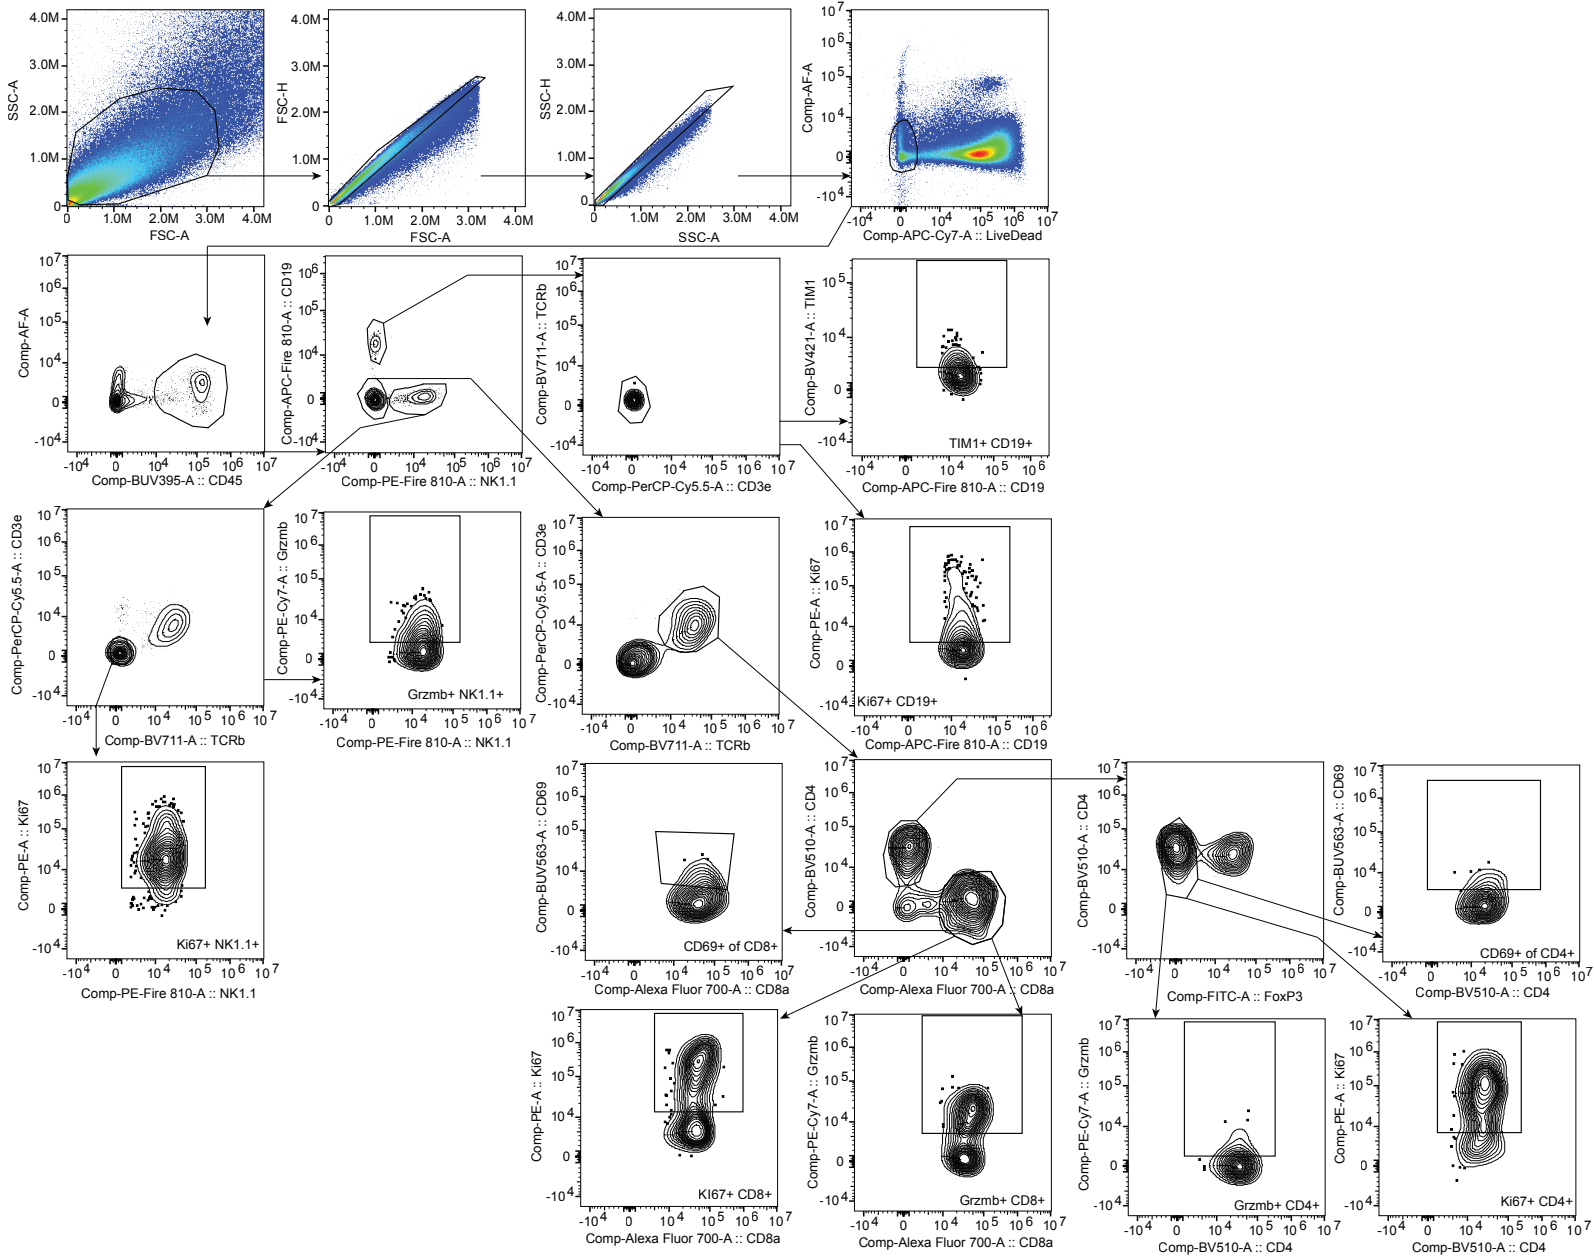

Related to: Figure 4h and Extended Data Figure 7f, 8e.

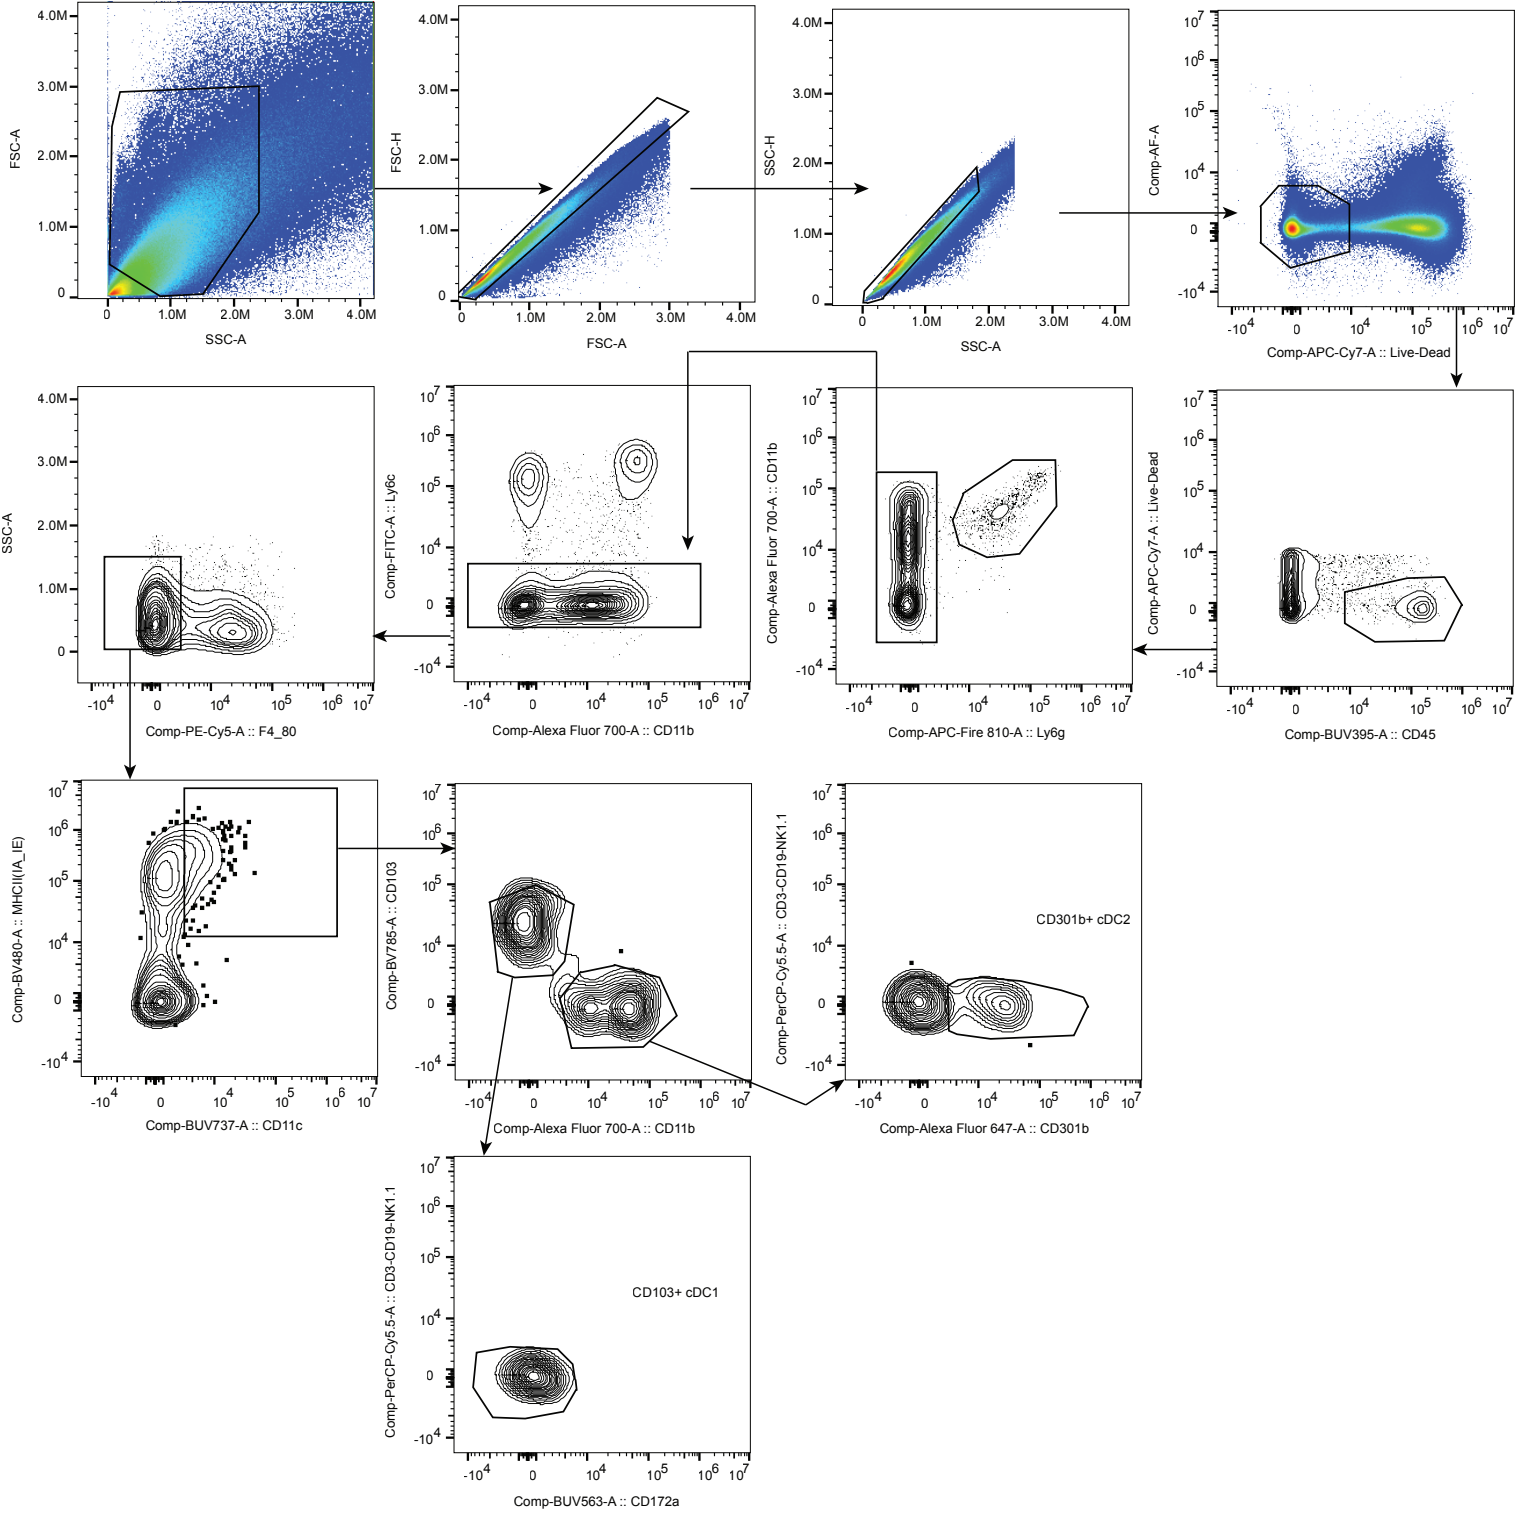



Redenti et al., SI Figure 7 - Gating strategy for cDC1 and cDC2, tumor-draining lymph nodes. Related to: Figure 3b, 3c, and Extended Data Figure 6a, 6k.

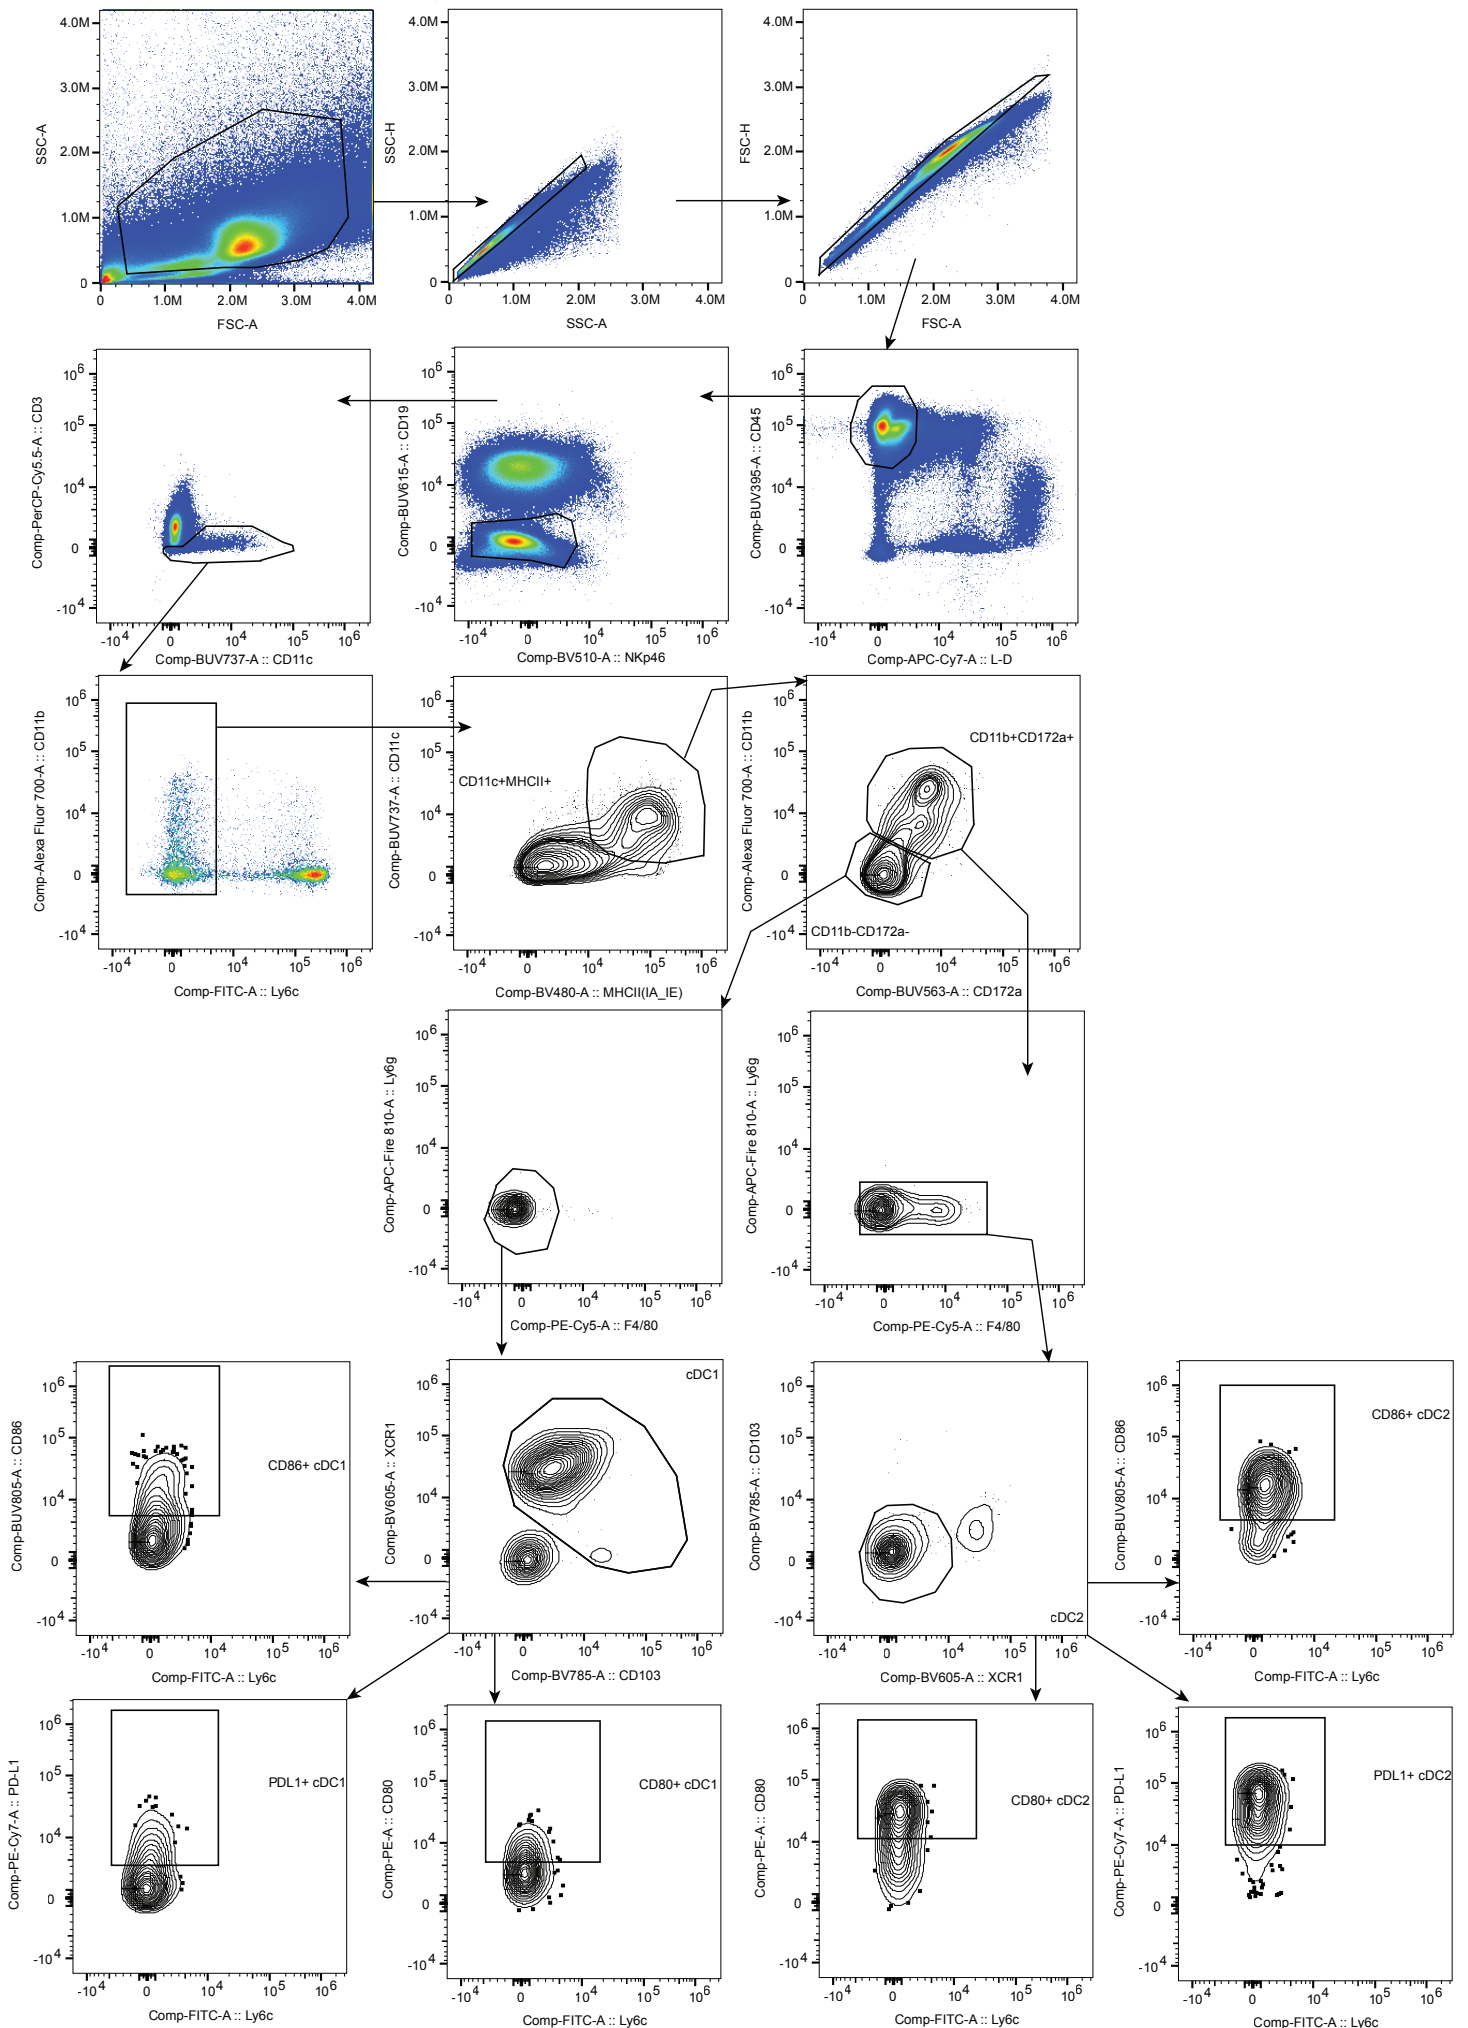

Redenti et al., SI Figure 8 - Gating strategy for myeloid cells, B16F10 tumors.  
 Related to: Figure 5e, and Extended Data Figure 7j, 8d, 8e.

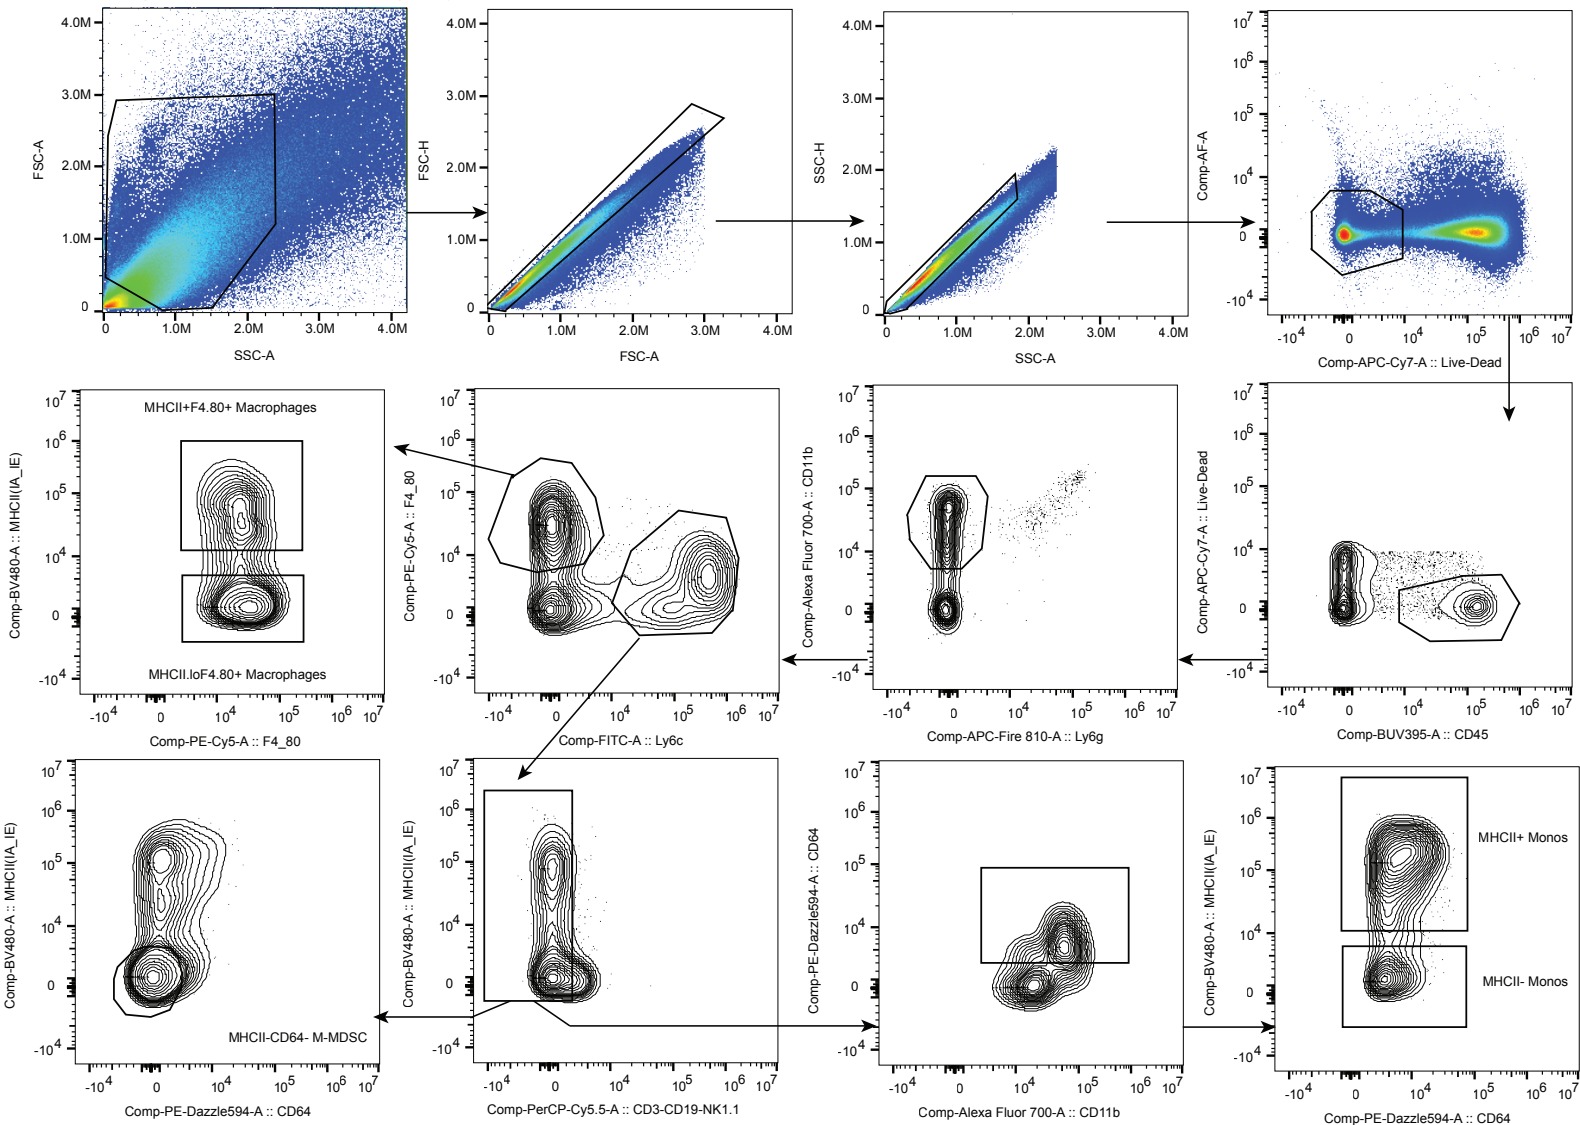

Redenti et al., SI Figure 9 - Gating strategy for myeloid cells in CT26 tumors.

Related to: Figure 3f, 3g, and Extended Data Figure 6j.

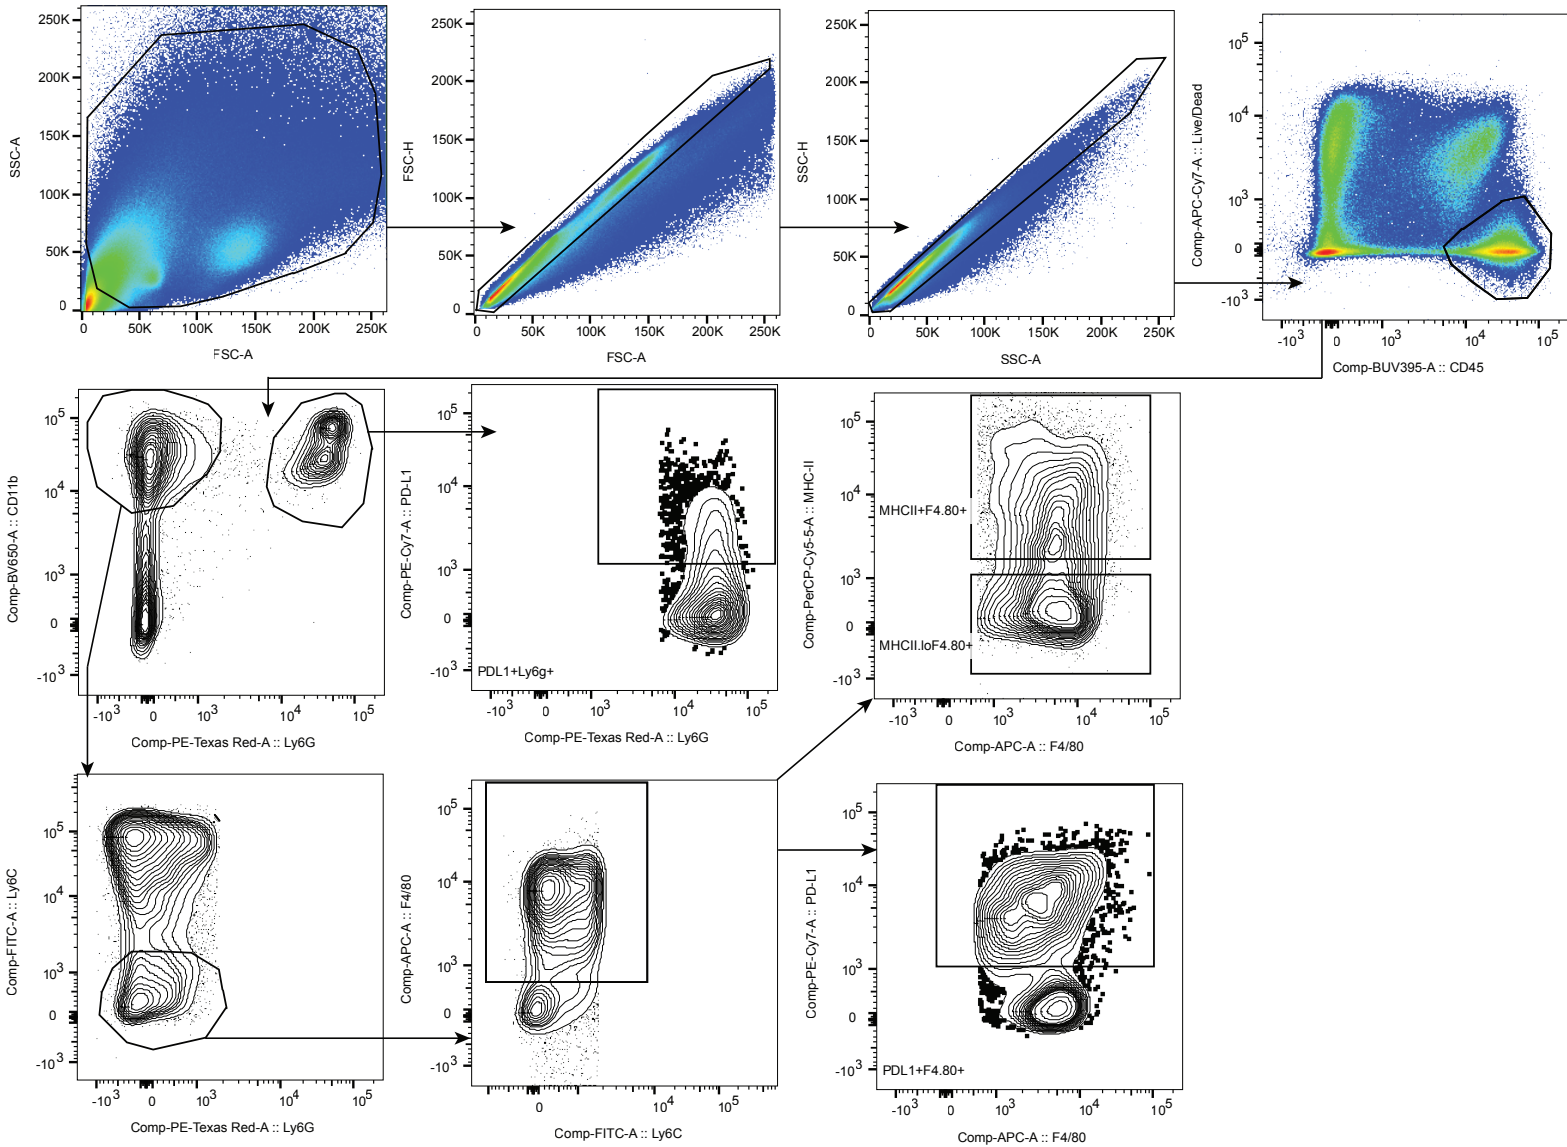

Redenti et al., SI Figure 10 - Gating strategy for BMDM phagocytosis assay.

Related to: Figure 1c.

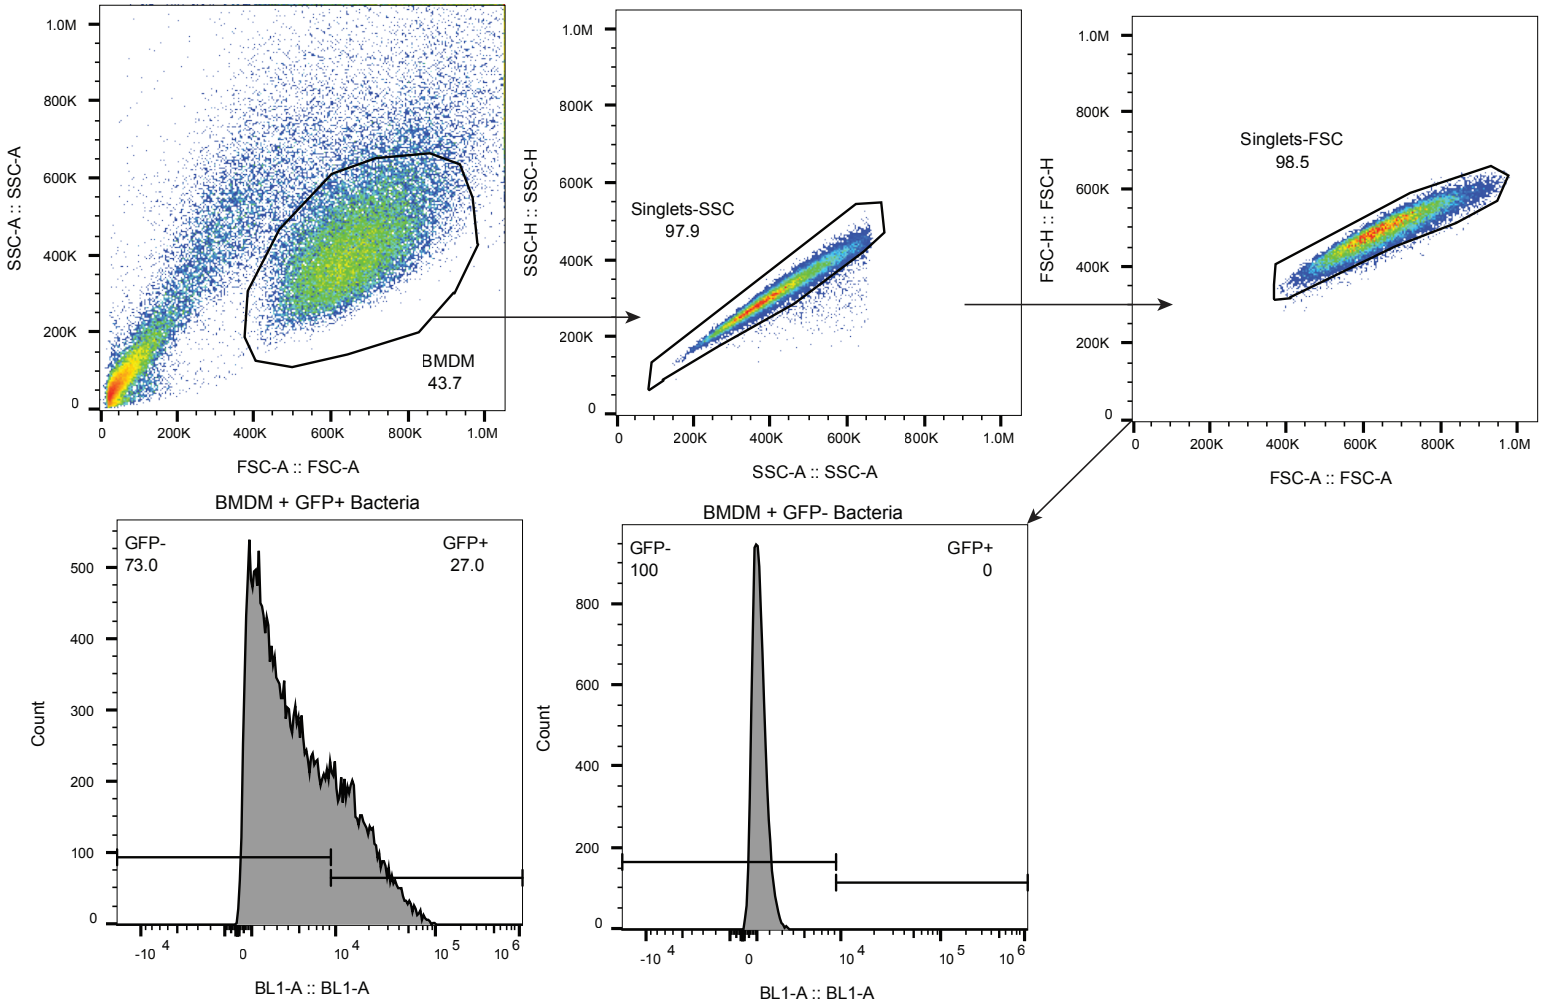

Supplement: 41586_2024_8033_MOESM1_ESM.pdf [file 41586_2024_8033_MOESM1_ESM.pdf]
