# Supplementary material for: Probiotic neoantigen delivery vectors for precision cancer immunotherapy
Source: PubMed Central journal article supplement — Nature. 2024 Oct 16;635(8038):453–61. doi: 10.1038/s41586-024-08033-4 (PMC11560847; doi:10.1038/s41586-024-08033-4), 2024-10-16
Supplement: 41586_2024_8033_MOESM2_ESM.pdf [file 41586_2024_8033_MOESM2_ESM.pdf]

## Reporting Summary

Nature Portfolio wishes to improve the reproducibility of the work that we publish. This form provides structure for consistency and transparency in reporting. For further information on Nature Portfolio policies, see our [Editorial Policies](#) and the [Editorial Policy Checklist](#).

### Statistics

For all statistical analyses, confirm that the following items are present in the figure legend, table legend, main text, or Methods section.

n/a | Confirmed

- The exact sample size ( $n$ ) for each experimental group/condition, given as a discrete number and unit of measurement
- A statement on whether measurements were taken from distinct samples or whether the same sample was measured repeatedly
- The statistical test(s) used AND whether they are one- or two-sided  
*Only common tests should be described solely by name; describe more complex techniques in the Methods section.*
- A description of all covariates tested
- A description of any assumptions or corrections, such as tests of normality and adjustment for multiple comparisons
- A full description of the statistical parameters including central tendency (e.g. means) or other basic estimates (e.g. regression coefficient) AND variation (e.g. standard deviation) or associated estimates of uncertainty (e.g. confidence intervals)
- For null hypothesis testing, the test statistic (e.g.  $F$ ,  $t$ ,  $r$ ) with confidence intervals, effect sizes, degrees of freedom and  $P$  value noted  
*Give  $P$  values as exact values whenever suitable.*
- For Bayesian analysis, information on the choice of priors and Markov chain Monte Carlo settings
- For hierarchical and complex designs, identification of the appropriate level for tests and full reporting of outcomes
- Estimates of effect sizes (e.g. Cohen's  $d$ , Pearson's  $r$ ), indicating how they were calculated

*Our web collection on [statistics for biologists](#) contains articles on many of the points above.*

### Software and code

Policy information about [availability of computer code](#)

Data collection

Data analysis

For manuscripts utilizing custom algorithms or software that are central to the research but not yet described in published literature, software must be made available to editors and reviewers. We strongly encourage code deposition in a community repository (e.g. GitHub). See the Nature Portfolio [guidelines for submitting code & software](#) for further information.

### Data

Policy information about [availability of data](#)

All manuscripts must include a [data availability statement](#). This statement should provide the following information, where applicable:

- Accession codes, unique identifiers, or web links for publicly available datasets
- A description of any restrictions on data availability
- For clinical datasets or third party data, please ensure that the statement adheres to our [policy](#)

Whole exome sequencing and RNA-Seq data generated for this study are deposited under umbrella BioProject accession number PRJNA1025007. Whole exome

data are available on the Short Read Archive with BioProject ID PRJNA1024050. RNA-seq data are available on NCBI Gene Expression Omnibus with accession number GSE244808. All other data are available within the article or its Supplementary Information. Source data are provided with this paper. Datasets utilized for analyses in this study: Ensembl release 102 M. musculus GRCm38 gene annotations (GRCm38, [https://useast.ensembl.org/Mus\\_musculus/Info/Index](https://useast.ensembl.org/Mus_musculus/Info/Index), accession: GCA\_000001635.8), and dbSNP build 142 (<ftp.ncbi.nih.gov/snp>).

## Research involving human participants, their data, or biological material

Policy information about studies with [human participants or human data](#). See also policy information about [sex, gender \(identity/presentation\), and sexual orientation](#) and [race, ethnicity and racism](#).

|                                                                    |     |
|--------------------------------------------------------------------|-----|
| Reporting on sex and gender                                        | N/A |
| Reporting on race, ethnicity, or other socially relevant groupings | N/A |
| Population characteristics                                         | N/A |
| Recruitment                                                        | N/A |
| Ethics oversight                                                   | N/A |

Note that full information on the approval of the study protocol must also be provided in the manuscript.

## Field-specific reporting

Please select the one below that is the best fit for your research. If you are not sure, read the appropriate sections before making your selection.

Life sciences     Behavioural & social sciences     Ecological, evolutionary & environmental sciences

For a reference copy of the document with all sections, see [nature.com/documents/nr-reporting-summary-flat.pdf](https://nature.com/documents/nr-reporting-summary-flat.pdf)

## Life sciences study design

All studies must disclose on these points even when the disclosure is negative.

|                 |                                                                                                                                                                                                                                                                                                                                                                                                                                                                                                                                   |
|-----------------|-----------------------------------------------------------------------------------------------------------------------------------------------------------------------------------------------------------------------------------------------------------------------------------------------------------------------------------------------------------------------------------------------------------------------------------------------------------------------------------------------------------------------------------|
| Sample size     | We base our sample size on standards in the field, as well as our prior experience and work involving bacterial and mammalian cell studies, and animal trials (PMCID: PMC6688650, PMC7685004, PMC10915968). These previous studies, along with small pilot studies, served as the basis for determination of sample size. Sample size is explicitly stated for each experimental group for individual experiments in figure captions and data descriptions.                                                                       |
| Data exclusions | No data were excluded.                                                                                                                                                                                                                                                                                                                                                                                                                                                                                                            |
| Replication     | All results in the manuscript were replicated at least 2-3 times in independent experiments.                                                                                                                                                                                                                                                                                                                                                                                                                                      |
| Randomization   | For subcutaneous tumor models: treatment groups were created by selecting from a pool of animals with comparable tumor volume, such that the average tumor between each group was approximately equal at the beginning of all experiments. For metastatic tumor models: animals were randomly distributed between groups after intravenous injection of tumor cells prior to treatment and imaging. For in vitro experiments, equal numbers of cells were seeded or utilized, and randomly allocated between experimental groups. |
| Blinding        | Investigators were not blinded to groups in in vitro or in vivo studies as this was necessary information to carry out studies.                                                                                                                                                                                                                                                                                                                                                                                                   |

## Reporting for specific materials, systems and methods

We require information from authors about some types of materials, experimental systems and methods used in many studies. Here, indicate whether each material, system or method listed is relevant to your study. If you are not sure if a list item applies to your research, read the appropriate section before selecting a response.

## Materials &amp; experimental systems

## Methods

| n/a                                 | Involved in the study                                           |
|-------------------------------------|-----------------------------------------------------------------|
| <input type="checkbox"/>            | <input checked="" type="checkbox"/> Antibodies                  |
| <input type="checkbox"/>            | <input checked="" type="checkbox"/> Eukaryotic cell lines       |
| <input checked="" type="checkbox"/> | <input type="checkbox"/> Palaeontology and archaeology          |
| <input type="checkbox"/>            | <input checked="" type="checkbox"/> Animals and other organisms |
| <input checked="" type="checkbox"/> | <input type="checkbox"/> Clinical data                          |
| <input checked="" type="checkbox"/> | <input type="checkbox"/> Dual use research of concern           |
| <input checked="" type="checkbox"/> | <input type="checkbox"/> Plants                                 |

| n/a                                 | Involved in the study                              |
|-------------------------------------|----------------------------------------------------|
| <input checked="" type="checkbox"/> | <input type="checkbox"/> ChIP-seq                  |
| <input type="checkbox"/>            | <input checked="" type="checkbox"/> Flow cytometry |
| <input checked="" type="checkbox"/> | <input type="checkbox"/> MRI-based neuroimaging    |

## Antibodies

## Antibodies used

The antibodies used in the study are listed below. They are listed in the following format: antigen target, clone name, supplier, catalog number, manufacturer link.

For immunofluorescence:

1. Anti-chicken ovalbumin, EPR27117-90, Abcam, ab306591, <https://www.abcam.com/en-us/products/primary-antibodies/ovalbumin-antibody-epr27117-90-ab306591#>
2. Anti-CD11b (murine), M1/70, Abcam, ab8878, <https://www.abcam.com/en-us/products/primary-antibodies/cd11b-antibody-m1-70-ab8878>

For immunoblotting:

1. Anti-6xHis,  $\alpha$ THE, Genscript, A00186S, [https://www.genscript.com/antibody/A00186S-THE\\_His\\_Tag\\_Antibody\\_mAb\\_Mouse.html](https://www.genscript.com/antibody/A00186S-THE_His_Tag_Antibody_mAb_Mouse.html)
2. Anti-DnaK, 8E2/2, Abcam, ab69617, <https://www.abcam.com/en-us/products/primary-antibodies/dnak-antibody-8e2-2-ab69617>

For flow cytometry, the fluorochrome-conjugated anti-mouse antibodies used were:

1. CD4-PEDazzle594, RM4-5, Biolegend, 100565, <https://www.biolegend.com/en-us/products/pe-dazzle-594-anti-mouse-cd4-antibody-9845>
2. NKp46-BV605, 29A1.4, BD Biosciences, 564069, <https://wwwbdbiosciences.com/en-us/products/reagents/flow-cytometry-reagents/research-reagents/single-color-antibodies-ruo/bv605-rat-anti-mouse-cd335-nkp46.564069>
3. NK1.1-BUV395, PK136, BD Biosciences, 564144, <https://wwwbdbiosciences.com/en-us/products/reagents/flow-cytometry-reagents/research-reagents/single-color-antibodies-ruo/buv395-mouse-anti-mouse-nk-1-1.564144>
4. CD45-BV650, 30-F11, Biolegend, 103151, <https://www.biolegend.com/en-us/products/brilliant-violet-650-anti-mouse-cd45-antibody-11987>
5. CD45-BUV395, 30-F11, BD Biosciences, 564279, <https://wwwbdbiosciences.com/en-us/products/reagents/flow-cytometry-reagents/research-reagents/single-color-antibodies-ruo/buv395-rat-anti-mouse-cd45.564279>
6. B220-BUV496, RA3-6B2, BD Biosciences, 612950, <https://wwwbdbiosciences.com/en-us/products/reagents/flow-cytometry-reagents/research-reagents/single-color-antibodies-ruo/buv496-rat-anti-mouse-cd45r-b220.612950>
7. CD19-APC/Fire810, 6D5, Biolegend, 115577, <https://www.biolegend.com/en-us/products/apc-fire-810-anti-mouse-cd19-antibody-20595?GroupID=BLG10556>
8. CD8a-AF700, 53-6.7, Biolegend, 100729, <https://www.biolegend.com/en-us/products/alexa-fluor-700-anti-mouse-cd8a-antibody-3387>
9. TIM1-BV421, RMT1-4, BD Biosciences, 566336, [https://wwwbdbiosciences.com/en-us/products/reagents/flow-cytometry-reagents/research-reagents/single-color-antibodies-ruo/BV421-Rat-Anti-Mouse-CD365-\(TIM-1\).566336](https://wwwbdbiosciences.com/en-us/products/reagents/flow-cytometry-reagents/research-reagents/single-color-antibodies-ruo/BV421-Rat-Anti-Mouse-CD365-(TIM-1).566336)
10. CD69-BUV563, H1.2F3, BD Biosciences, 741234, <https://wwwbdbiosciences.com/en-us/products/reagents/flow-cytometry-reagents/research-reagents/single-color-antibodies-ruo/buv563-hamster-anti-mouse-cd69.741234>
11. Foxp3-FITC, FJK-16s, Thermo, 11-5773-82, <https://www.thermofisher.com/antibody/product/FOXP3-Antibody-clone-FJK-16s-Monoclonal/11-5773-82>
12. CD3 $\epsilon$ -BV785, 145-2C11, Biolegend, <https://www.biolegend.com/en-us/clone-search/brilliant-violet-785-anti-mouse-cd3epsilon-antibody-12081>
13. CD3 $\epsilon$ -PerCP/Cy5.5, 145-2C11, Biolegend, 100327, <https://www.biolegend.com/en-us/products/percp-cyanine5-5-anti-mouse-cd3epsilon-antibody-4191>
14. TCR $\beta$ -BV711, H57-507, BD Biosciences, 563135, <https://wwwbdbiosciences.com/en-us/products/reagents/flow-cytometry-reagents/research-reagents/single-color-antibodies-ruo/bv711-hamster-anti-mouse-tcr-chain.563135>
15. Ki67-PE, SolA15, Thermo, 12-5698-80, <https://www.thermofisher.com/antibody/product/Ki-67-Antibody-clone-SolA15-Monoclonal/12-5698-80>
16. GranzymeB-PE-Cy7, QA16A02, Biolegend, 372213, <https://www.biolegend.com/en-us/products/pe-cyanine7-anti-humanmouse-granzyme-b-recombinant-antibody-15582>
17. TNF $\alpha$ -AF647, MP6-XT22, Biolegend, 506314, <https://www.biolegend.com/en-us/products/alexa-fluor-647-anti-mouse-tnf-alpha-antibody-2724>
18. IFN  $\gamma$ -PE, XMGI.2, Biolegend, 505807, <https://www.biolegend.com/en-us/products/pe-anti-mouse-ifn-gamma-antibody-997>
19. Ly6C-FITC, HK1.4, Biolegend, 128005, <https://www.biolegend.com/en-us/products/fitc-anti-mouse-ly-6c-antibody-4896>
20. I-A/I-E-BV480, M5/114.15.2, BD Biosciences, 566088, <https://wwwbdbiosciences.com/en-us/products/reagents/flow-cytometry-reagents/research-reagents/single-color-antibodies-ruo/bv480-rat-anti-mouse-i-a-i-e.566088>
21. I-A/I-E-PerCP/Cy5.5, M5/114.15.2, BD Biosciences, 562363, <https://wwwbdbiosciences.com/en-us/products/reagents/flow-cytometry-reagents/research-reagents/single-color-antibodies-ruo/percp-cy-5-5-rat-anti-mouse-i-a-i-e.562363>
22. XCR1-BV605, ZET, Biolegend, 148222, <https://www.biolegend.com/en-us/products/brilliant-violet-605-anti-mouse-rat-xcr1-antibody-22025>
23. CD11b-AF700, M1/70, Biolegend, 101222, <https://www.biolegend.com/en-us/products/alexa-fluor-700-anti-mouse-human-cd11b-antibody-3388>

24. CD11b-BV650, M1/70, Biolegend, 101239, <https://www.biolegend.com/en-us/products/brilliant-violet-650-anti-mouse-human-cd11b-antibody-7638?GroupID=BLG10599>
25. CD103-BV785, 2E7, Biolegend, 121439, <https://www.biolegend.com/en-us/products/brilliant-violet-785-anti-mouse-cd103-antibody-17353>
26. F4/80-PE-Cy5, BM8, Biolegend, 123111, <https://www.biolegend.com/en-us/products/pe-cyanine5-anti-mouse-f4-80-antibody-4069>
27. F4/80-APC, BM8, Biolegend, 123115, <https://www.biolegend.com/en-us/products/apc-anti-mouse-f4-80-antibody-4071>
28. CD11c-BUV737, HL3, BD Biosciences, 612796, <https://www.bdbiosciences.com/en-us/products/reagents/flow-cytometry-reagents/research-reagents/single-color-antibodies-ruo/buv737-hamster-anti-mouse-cd11c.612796>
29. CD172a-BUV563, P84, Biolegend, 741349, <https://www.bdbiosciences.com/en-us/products/reagents/flow-cytometry-reagents/research-reagents/single-color-antibodies-ruo/buv563-rat-anti-mouse-cd172a.741349>
30. Ly6G-APC/Fire810, 1A8, Biolegend, 127669, <https://www.biolegend.com/en-us/products/apc-fire-810-anti-mouse-ly-6g-antibody-21380>
31. Ly6G-PE-CF594, 1A8, BD Biosciences, 562700, <https://www.bdbiosciences.com/en-us/products/reagents/flow-cytometry-reagents/research-reagents/single-color-antibodies-ruo/pe-cf594-rat-anti-mouse-ly-6g.562700>
32. PDL1-PE-Cy7, 10F.9G2, Biolegend, 124313, <https://www.biolegend.com/en-us/products/pe-cyanine7-anti-mouse-cd274-b7-h1-pd-l1-antibody-6721>
33. CD301b-AF647, URA-1, Biolegend, 146805, <https://www.biolegend.com/en-us/products/alexa-fluor-647-anti-mouse-cd301b-mgl2-antibody-9657>
34. CD19-PerCP/Cy5.5, 1D3, Biolegend, 152405, <https://www.biolegend.com/en-us/products/percp-cyanine5-5-anti-mouse-cd19-antibody-13640>
35. NK1.1-PerCP/Cy5.5, PK136, Biolegend, 108727, <https://www.biolegend.com/en-us/products/percp-cyanine5-5-anti-mouse-nk-11-antibody-4289>
36. Nkp46-BV510, 29A1.4, Biolegend, 137623, <https://www.biolegend.com/en-us/products/brilliant-violet-510-anti-mouse-cd335-nkp46-antibody-9578>
37. CD64-PEDazzle594, X54-5/7.1, Biolegend, 139319, <https://www.biolegend.com/en-us/products/pe-dazzle-594-anti-mouse-cd64-fcgmari-antibody-12424>
38. CD80-PE, 16-10A1, Biolegend, 104707, <https://www.biolegend.com/en-us/products/pe-anti-mouse-cd80-antibody-43>
39. CD86-BUV805, GL-1, BD Biosciences, 741946, <https://www.bdbiosciences.com/en-us/products/reagents/flow-cytometry-reagents/research-reagents/single-color-antibodies-ruo/buv805-rat-anti-mouse-cd86.741946>
40. H2Kb-SIINFEKL-PE, 25-D1.16, Biolegend, 141603, <https://www.biolegend.com/en-us/products/pe-anti-mouse-h-2kb-bound-to-siinfekl-antibody-7247>
41. CD3-PE, 17A2, Biolegend, 100205, <https://www.biolegend.com/en-us/products/pe-anti-mouse-cd3-antibody-47>

For in-vivo antibody depletion:

1. Anti-mouse CD4, clone GK1.5, BioXcell, #BE0003-1, <https://bioxcell.com/invivomab-anti-mouse-cd4-be0003-1>
2. Anti-mouse CD8b, clone Ly-3.2, BioXcell, #BE0223, [https://bioxcell.com/invivomab-anti-mouse-cd8-beta-lyt-3-2-be0223?queryID=968b7720c10d16b0d5bb810a89b7bd1f&objectID=30662&indexName=bioxcell\\_live\\_default\\_products](https://bioxcell.com/invivomab-anti-mouse-cd8-beta-lyt-3-2-be0223?queryID=968b7720c10d16b0d5bb810a89b7bd1f&objectID=30662&indexName=bioxcell_live_default_products)
3. IgG1 isotype control, clone HRPN, BioXcell, #BE0088, [https://bioxcell.com/invivomab-rat-igg1-isotype-control-anti-horseradish-peroxidase-be0088?queryID=c68a9872d06a3d920db5f601de05fe61&objectID=30559&indexName=bioxcell\\_live\\_default\\_products](https://bioxcell.com/invivomab-rat-igg1-isotype-control-anti-horseradish-peroxidase-be0088?queryID=c68a9872d06a3d920db5f601de05fe61&objectID=30559&indexName=bioxcell_live_default_products)

Validation

All antibodies used in this study are commercially available, and were validated by the manufactures, which can be accessed through the link provided for each antibody listed.

## Eukaryotic cell lines

Policy information about [cell lines and Sex and Gender in Research](#)

|                                                                      |                                                                                                              |
|----------------------------------------------------------------------|--------------------------------------------------------------------------------------------------------------|
| Cell line source(s)                                                  | B16F10 (ATCC CRL-6475), CT26 (ATCC CRL-2638), 4T1 (ATCC CRL-2539)                                            |
| Authentication                                                       | Cells were frozen down at early passages after receipt from ATCC and thus did not require re-authentication. |
| Mycoplasma contamination                                             | Cells were confirmed mycoplasma free.                                                                        |
| Commonly misidentified lines<br>(See <a href="#">ICLAC</a> register) | No commonly misidentified cell lines were used.                                                              |

## Animals and other research organisms

Policy information about [studies involving animals](#); [ARRIVE guidelines](#) recommended for reporting animal research, and [Sex and Gender in Research](#)

|                         |                                                                                                                                                                                                                                                                                            |
|-------------------------|--------------------------------------------------------------------------------------------------------------------------------------------------------------------------------------------------------------------------------------------------------------------------------------------|
| Laboratory animals      | Mice were housed in a facility with a 12-hour light-dark cycle, and provided unrestricted access to both food and water. The housing facility was maintained at 21–24°C, and kept at 40-60% humidity. Animals used included female 6-7 week old BALB/c, C57BL/6, and B6(Cg)-Tyrc-2/J mice. |
| Wild animals            | No wild animals were used in this study.                                                                                                                                                                                                                                                   |
| Reporting on sex        | Female mice were used in animal studies, as male mice exhibit aggressive behaviors and fight which we noted to cause wounding to the tumors and one another, which can affect experimental outcomes (PMCID: PMC9817818, PMC7538892).                                                       |
| Field-collected samples | No field-collected samples were used in this study.                                                                                                                                                                                                                                        |

Note that full information on the approval of the study protocol must also be provided in the manuscript.

## Flow Cytometry

### Plots

Confirm that:

- The axis labels state the marker and fluorochrome used (e.g. CD4-FITC).
- The axis scales are clearly visible. Include numbers along axes only for bottom left plot of group (a 'group' is an analysis of identical markers).
- All plots are contour plots with outliers or pseudocolor plots.
- A numerical value for number of cells or percentage (with statistics) is provided.

### Methodology

#### Sample preparation

Tumors and TDLN were extracted either 2 or 8 days post intravenous treatment for flow cytometry immunophenotyping. Lymphoid and myeloid immune subsets were isolated from tumor tissue by mechanical homogenization of tumor or TDLN tissue, followed by digestion with collagenase A (1mg/ml, Roche) and DNase I (0.5 µg/ml, Roche) in isolation buffer (RPMI 1640 with 5% FBS, 1% L-glutamine, 1% penicillin-streptomycin, and 10mM HEPES) for 1 hour at 37°C for tumors or 30 minutes at 37°C for TDLNs, on a shaker platform at 150rpm. For ex vivo lymphocyte stimulation with PMA and ionomycin, TDLNs were not digested prior. Tumor and TDLN homogenates were filtered through 100 µm cell strainers and washed in isolation buffer. To measure cytokine production by T cells, cells were stimulated for 3-hours with PMA (50ng/ml, Sigma-Aldrich) and ionomycin (1nM, Calbiochem) in the presence of brefeldin A (1µg/ml). To measure neoantigen-specific cytokine production by T cells, cells were stimulated for 5 hours with pools of peptides (2µg/ml) representing the neoantigens encoded in therapeutic strains in the presence of brefeldin A (1µg/ml). Cells were stained in FACS buffer. Ghost Dye cell viability reagent was used to exclude dead cells (diluted 1:1000 in PBS), followed by extracellular staining. After extracellular staining, cells were washed with FACS buffer, and either directly used for flow cytometry analysis, or fixed using the FOXP3/transcription factor staining buffer set (Tonbo), as per manufacturer's instructions. Cells were then stained intracellularly for lymphoid immunophenotyping panels. After staining, cells were washed and resuspended with FACS buffer for flow cytometry analysis.

#### Instrument

BD LSRFortessa, Cytex Aurora cell analyzer.

#### Software

Collection: FACS Diva v8.0. or SpectroFlo v3.0. Analysis: Flowjo v10.0.

#### Cell population abundance

Cell population abundance depends on the particular cell type, tissue type, and treatment conditions. All cell populations were identifiable by flow cytometry following digestion of either tumor or TDLN.

#### Gating strategy

Pre-processed FSC files were initially gated on FSC-A and SSC-A to exclude large and small debris or clumps. FSC-H vs. FSC-A, followed by SSC-H vs. SSC-A were used to exclude non-singlet events. CD45 vs. Viability dye were gated to include all live lymphocytes.

For myeloid cell analysis: PMNs were defined as CD45+CD11b+Ly6G+ cells. Macrophages were defined as CD45+CD11b+Ly6G-Ly6C-F4/80+ cells. Monocytes were defined as CD45+CD11b+Ly6G-Ly6C+F4/80-Lin-CD64+MHCII+. M-MDSC cells were defined as CD45+CD11b+Ly6G-Ly6c+F4/80-MHCII-CD64- cells. cDC1 were defined as CD45+Ly6G-Ly6c-F4/80-CD11c+MHCII+CD11b-CD172a-Lin-XCR1+ and/or CD103+ cells. cDC2 were defined as CD45+Ly6G-CD11b+CD172a+/-Ly6C-F4/80+/-CD11c+MHCII+Lin-CD103-, and also CD301b+ in the B16 model. Expression markers (PD-L1, CD80, CD86) were gated on major lineage cells ex vivo. For lymphoid cell analysis: B cells were defined as CD45+CD19/B220+NK1.1-CD3-TCRb-. Nkp46 was used in place of NK1.1 for BALB/c mice. CD8+ T cells were defined as CD45+CD19/B220-NK1.1-CD3+TCRb+CD4-CD8+. Conventional Foxp3-CD4+ T cells were defined as CD45+CD19/B220-NK1.1-CD3+TCRb+CD8-Foxp3-CD4+ cells. NK cells were defined as CD45+CD19/B220-CD3-TCRb-NK1.1+ cells. Expression markers (CD69, Granzyme-B, Ki67) were gated on major lineage cells ex vivo, while cytokines (IFN $\gamma$ , TNF $\alpha$ ) were gated post stimulation.

- Tick this box to confirm that a figure exemplifying the gating strategy is provided in the Supplementary Information.
